# Supplementary material
Source: PubMed Central journal article supplement (PMC8991459)
Supplement: mmc1.pdf [file mmc1.pdf]

1. Sex

- Male
- Female

2. Please select your age group

- 18-30
- 31-50
- 51-70
- 70-90
- Over 91

3. Please indicate if you have a history of the following medical problems:

- Cancer
- Chronic Kidney Disease
- Chronic Obstructive Pulmonary Disease (COPD)
- Obesity (BMI > 30)
- Heart Conditions (such as Heart Failure, Coronary Artery Disease, abnormal stress test, history of stents or bypass, or Cardiomyopathy)
- Type 2 Diabetes

4. How long have you had symptoms for your upper extremity problem?

- 1 day to 1 week
- 1 week to 1 month
- 1 month to 6 months
- > 6 months

5. Did your upper extremity problem result from recent trauma or accident?

- Yes
- No

6. Did you delay seeking medical attention for your upper extremity problem because of the COVID-19 pandemic?

Yes

No

7. How many days did you delay treatment?

0 100 200

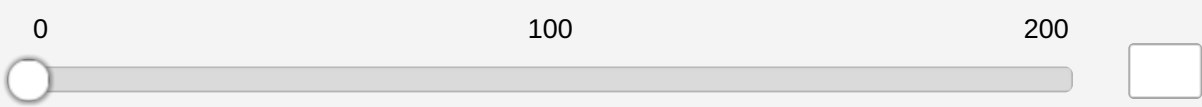

8. During your office visit, do you feel that preventative measures, specifically against COVID, were adequate?

Yes

No

9. Please rate your perception of the following statement: Screening for COVID in the operating room was adequate

Strongly Agree

Agree

Neutral

Disagree

Strongly Disagree

10. Please rate the level of discomfort of the COVID Test

No Discomfort

Mild Discomfort

Moderate Discomfort

Significant Discomfort

Severe Discomfort

11. Was your surgery delayed because of COVID testing? (ie not getting your results in time for the procedure)

Yes

No

12. Please rate your perception of the following:

|                                                                                                                     | Strongly Agree        | Agree                 | Neutral               | Disagree              | Strongly Disagree     |
|---------------------------------------------------------------------------------------------------------------------|-----------------------|-----------------------|-----------------------|-----------------------|-----------------------|
| COVID testing prior to surgery is necessary                                                                         | <input type="radio"/> | <input type="radio"/> | <input type="radio"/> | <input type="radio"/> | <input type="radio"/> |
| COVID testing prior to surgery is inconvenient                                                                      | <input type="radio"/> | <input type="radio"/> | <input type="radio"/> | <input type="radio"/> | <input type="radio"/> |
| COVID testing was a barrier to surgery                                                                              | <input type="radio"/> | <input type="radio"/> | <input type="radio"/> | <input type="radio"/> | <input type="radio"/> |
| I feel safer in an operating room knowing all patients are tested prior to surgery                                  | <input type="radio"/> | <input type="radio"/> | <input type="radio"/> | <input type="radio"/> | <input type="radio"/> |
| Quarantining after COVID testing and prior to surgery is necessary                                                  | <input type="radio"/> | <input type="radio"/> | <input type="radio"/> | <input type="radio"/> | <input type="radio"/> |
| If you have a negative COVID test, you should not have to change your behavior before surgery                       | <input type="radio"/> | <input type="radio"/> | <input type="radio"/> | <input type="radio"/> | <input type="radio"/> |
| I did not care that my family member/friend/significant other was not allowed to come to the operating room with me | <input type="radio"/> | <input type="radio"/> | <input type="radio"/> | <input type="radio"/> | <input type="radio"/> |
